# Supplementary material for: The Association between Factor XI Deficiency and the Risk of Bleeding, Cardiovascular, and Venous Thromboembolic Events
Source: PubMed Central journal article supplement — Thromb Haemost. 2021 Sep 23;122(5):808–17. doi: 10.1055/s-0041-1735971 (PMC9197592; doi:10.1055/s-0041-1735971), 2021-09-23
Supplement: 10-1055-s-0041-1735971-s210341.pdf [file 10-1055-s-0041-1735971-s210341.pdf]

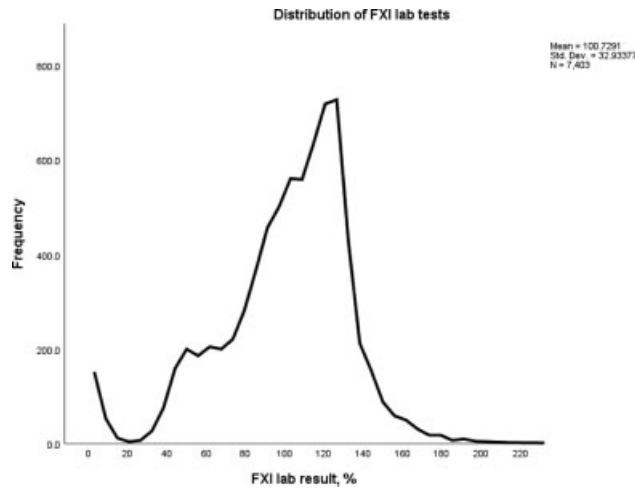

**Supplementary Figure S1** Distribution of FXI activity for all patients with a FXI text, 2007–2018,  $n = 7,403$ .

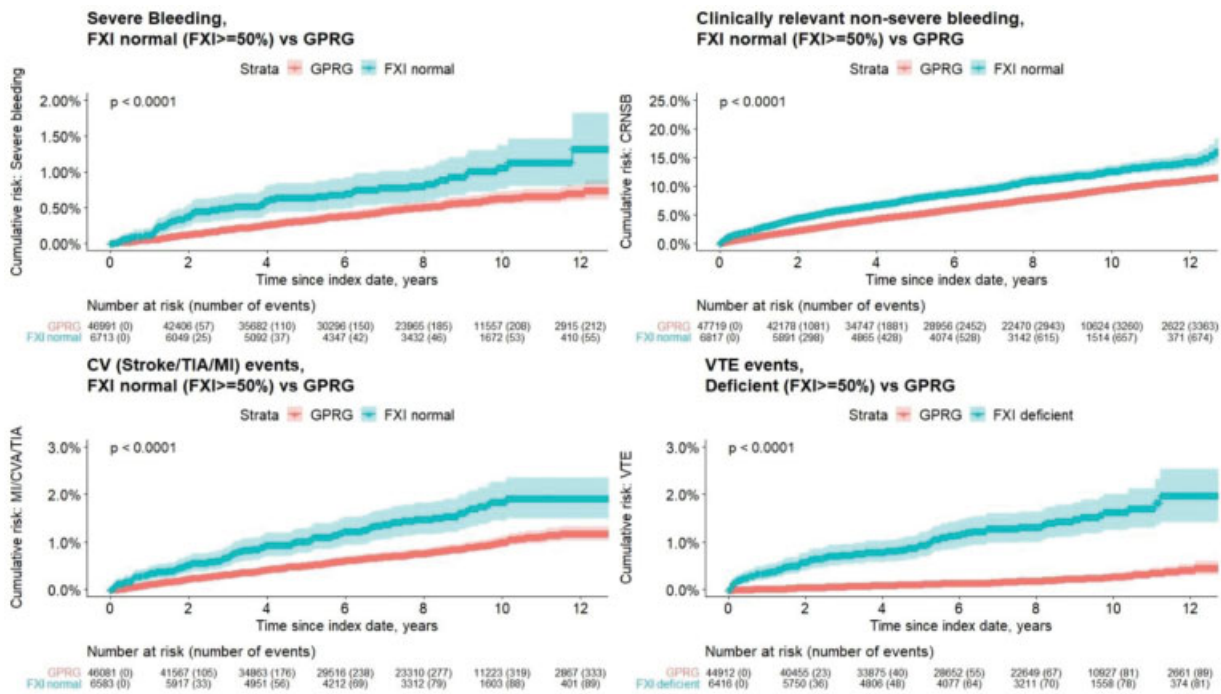

**Supplementary Figure S2** Cumulative incidence of severe bleeding, CRNSB, CV, and VTE events among patients with normal FXI activity levels ( $\geq 50\%$ ) compared with their matched general population reference group. CRNSB, clinically relevant nonsevere bleeding; CV, cardiovascular; FXI, factor XI; VTE, venous thromboembolism.

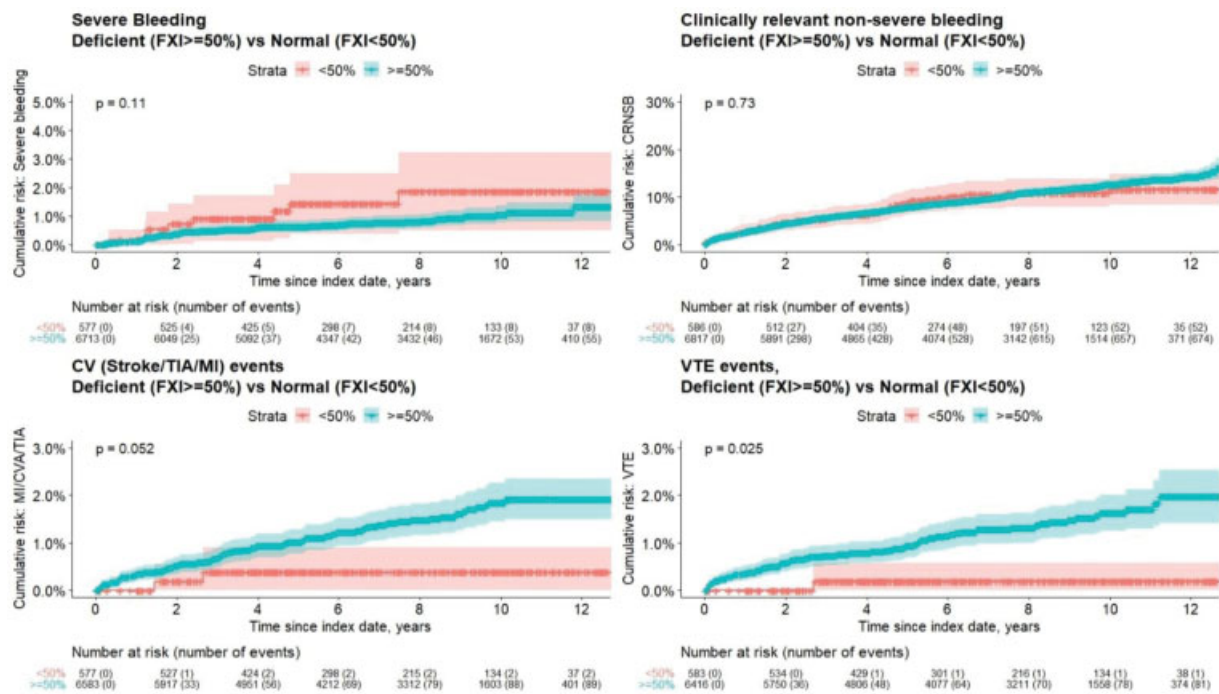

**Supplementary Figure S3** Cumulative incidence of severe bleeding, CRNSB, CV, and VTE events among patients with FXI deficiency (<50%) and patients with normal FXI activity levels (≥ 50%). CV, cardiovascular; CRNSB, clinically relevant nonsevere bleeding; FXI, factor XI; VTE, venous thromboembolism.

**Supplementary Table S1** Attrition table

|                                                 | <i>n</i> |
|-------------------------------------------------|----------|
| All patients with a FXI test result (2007–2018) | 10,904   |
| No prior cancer                                 | 10,467   |
| ≥1 year continuous eligibility in NHS           | 9,999    |
| 7 matches from the general population           | 9,823    |
| Age ≥ 18                                        | 7,403    |

**Supplementary Table S2** Distribution of FXI activity for each of the study cohorts

|            | All patients<br>( <i>n</i> = 7,403) | No prior severe bleed<br>( <i>n</i> = 7,290) | No prior CV event<br>( <i>n</i> = 7,160) | No prior VTE event<br>( <i>n</i> = 6,999) |
|------------|-------------------------------------|----------------------------------------------|------------------------------------------|-------------------------------------------|
| <15%       | 213 (2.9%)                          | 209 (2.9%)                                   | 208 (2.9%)                               | 212 (3.0%)                                |
| 15 to <50% | 373 (5.0%)                          | 368 (5.0%)                                   | 369 (5.2%)                               | 371 (5.3%)                                |
| ≥50%       | 6,817 (92.1%)                       | 6,713 (92.1%)                                | 6,583 (91.9%)                            | 6,416 (91.7%)                             |

Abbreviations: CV, cardiovascular; FXI, factor XI; VTE, venous thromboembolism.

**Supplementary Table S3** 10-year cumulative incidence, unadjusted, and adjusted hazard ratios comparing incident severe bleeding, CRNSB, CV, and VTE events among patients with normal FXI activity levels ( $\geq 50\%$ ) to their matched general population reference group

|                                               | N events | 10-year risk (95% CI) | Unadjusted HR (95% CI) | Fully adjusted HR (95% CI) |
|-----------------------------------------------|----------|-----------------------|------------------------|----------------------------|
| <b>Severe bleeding</b>                        |          |                       |                        |                            |
| Factor XI cohort $\geq 50\%$ , $n = 6,713$    | 55       | 1.10% (0.80–1.40%)    | 1.81 (1.34–2.43)       | 1.47 (1.04–2.09)           |
| General population controls, $n = 46,991$     | 213      | 0.60% (0.50–0.70%)    | Ref.                   | Ref.                       |
| <b>Clinically relevant nonsevere bleeding</b> |          |                       |                        |                            |
| Factor XI cohort $\geq 50\%$ , $n = 6,817$    | 678      | 12.60% (11.70–13.60%) | 1.43 (1.32–1.55)       | 1.28 (1.16–1.40)           |
| General population controls, $n = 47,719$     | 3,373    | 9.60% (9.20–9.90%)    | Ref.                   | Ref.                       |
| <b>CV (stroke/TIA/MI) events</b>              |          |                       |                        |                            |
| Factor XI cohort $\geq 50\%$ , $n = 6,583$    | 89       | 1.80% (1.40–2.30%)    | 1.88 (1.49–2.37)       | 1.73 (1.31–2.27)           |
| General population controls, $n = 46,081$     | 333      | 1.00% (0.90–1.10%)    | Ref.                   | Ref.                       |
| <b>VTE events</b>                             |          |                       |                        |                            |
| Factor XI cohort $\geq 50\%$ , $n = 6,416$    | 81       | 1.60% (1.20–2.00%)    | 6.33 (4.69–8.55)       | 3.39 (2.36–4.86)           |
| General population controls, $n = 44,912$     | 91       | 0.30% (0.20–0.30%)    | Ref.                   | Ref.                       |

Abbreviations: CI, confidence interval; CRNSB, Clinically relevant nonsevere bleeding; CV, cardiovascular; FXI, factor XI; HR, hazard ratio; MI, myocardial infarction; TIA, transient ischemic attack; VTE, venous thromboembolism.

**Supplementary Table S4** Association between FXI deficiency and outcomes using two different reference groups

| FXI activity                                  | Analysis using normal FXI as reference group, fully adjusted HR (95% CI) | Primary analysis, fully adjusted HR (95% CI) |
|-----------------------------------------------|--------------------------------------------------------------------------|----------------------------------------------|
| <b>Severe bleeding</b>                        |                                                                          |                                              |
| < 50%, $n = 577$                              | 1.53 (0.71–3.30)                                                         | 2.56 (1.13–5.81)                             |
| Reference group                               | FXI activity $\geq 50\%$                                                 | General population                           |
| <b>Clinically relevant nonsevere bleeding</b> |                                                                          |                                              |
| < 50%, $n = 586$                              | 0.95 (0.71–1.26)                                                         | 1.45 (1.08–1.97)                             |
| Reference group                               | FXI activity $\geq 50\%$                                                 | General population                           |
| <b>Cardiovascular events</b>                  |                                                                          |                                              |
| < 50%, $n = 577$                              | 0.28 (0.07–1.14)                                                         | 0.55 (0.13–2.36)                             |
| Reference group                               | FXI activity $\geq 50\%$                                                 | General population                           |
| <b>VTE</b>                                    |                                                                          |                                              |
| < 50%, $n = 586$                              | 0.20 (0.03–1.15)                                                         | 0.45 (0.06–3.47)                             |
| Reference group                               | FXI activity $\geq 50\%$                                                 | General population                           |

Abbreviations: CI, confidence interval; FXI, factor XI; HR, hazard ratio; VTE, venous thromboembolism.

**Supplementary Table S5** Sensitivity analysis for 10-year cumulative incidence, unadjusted, and adjusted hazard ratios comparing prevalent severe bleeding among patients with FXI deficiency to their matched general population reference group

|                                        | N events | 10-year risk (95% CI) | Unadjusted HR (95% CI) | Full adjusted HR (95% CI) | Full adjusted HR (95% CI), INCIDENT CASES |
|----------------------------------------|----------|-----------------------|------------------------|---------------------------|-------------------------------------------|
| Severe FXI deficiency (<15%)           |          |                       |                        |                           |                                           |
| Factor XI cohort, n = 213              | 1        | 0.50% (0.00–1.50)     | 0.65 (0.08–5.01)       | 0.60 (0.08–4.75)          | 0.49 (0.06–3.95)                          |
| General population controls, n = 1,491 | 11       | 1.30% (0.40–2.10)     | Ref.                   | Ref.                      | Ref.                                      |
| Partial FXI deficiency (15 to <50%)    |          |                       |                        |                           |                                           |
| Factor XI cohort, n = 373              | 8        | 2.70% (0.80–4.70)     | 11.10 (3.63–33.93)     | 9.03 (2.92–27.97)         | 5.27 (1.91–14.52)                         |
| General population controls, n = 2,611 | 5        | 0.20% (0.00–0.50)     | Ref.                   | Ref.                      | Ref.                                      |
| Overall FXI deficiency (<50%)          |          |                       |                        |                           |                                           |
| Factor XI cohort, n = 586              | 9        | 2.00% (0.60–3.40)     | 3.93 (1.74–8.89)       | 3.67 (1.61–8.36)          | 2.56 (1.13–5.81)                          |
| General population controls, n = 4,102 | 16       | 0.60% (0.30–0.90)     | Ref.                   | Ref.                      | Ref.                                      |

Abbreviations: CI, confidence interval; FXI, factor XI; HR, hazard ratio.

**Supplementary Table S6** Sensitivity analysis for 10-year cumulative incidence, unadjusted, and adjusted hazard ratios comparing prevalent CV events among patients with FXI deficiency to their matched general population reference group

|                                        | N events | 10-year risk (95% CI) | Unadjusted HR (95% CI) | Full adjusted HR (95% CI) | Full adjusted HR (95% CI), INCIDENT CASES |
|----------------------------------------|----------|-----------------------|------------------------|---------------------------|-------------------------------------------|
| Severe FXI deficiency (<15%)           |          |                       |                        |                           |                                           |
| Factor XI cohort, n = 213              | 4        | 2.70% (0.00–5.50%)    | 0.89 (0.32–2.52)       | 1.22 (0.42–3.53)          | 0.55 (0.07–4.33)                          |
| General population controls, n = 1,491 | 32       | 3.20% (2.00–4.50%)    | Ref.                   | Ref.                      | Ref.                                      |
| Partial FXI deficiency (15 to <50%)    |          |                       |                        |                           |                                           |
| Factor XI cohort, n = 373              | 1        | 0.30% (0.00–0.90%)    | 0.68 (0.09–5.29)       | 0.44 (0.05–3.47)          | 0.55 (0.06–4.73)                          |
| General population controls, n = 2,611 | 10       | 0.60% (0.20–1.00%)    | Ref.                   | Ref.                      | Ref.                                      |
| Overall FXI deficiency (<50%)          |          |                       |                        |                           |                                           |
| Factor XI cohort, n = 586              | 5        | 1.10% (0.10–2.10)     | 0.82 (0.33–2.08)       | 0.85 (0.34–2.17)          | 0.55 (0.13–2.36)                          |
| General population controls, n = 4,102 | 42       | 1.50% (1.00–2.00)     | Ref.                   | Ref.                      | Ref.                                      |

Abbreviations: CI, confidence interval; CV, cardiovascular; FXI, factor XI; HR, hazard ratio.

**Supplementary Table S7** Sensitivity analysis for 10-year cumulative incidence, unadjusted, and adjusted hazard ratios comparing prevalent VTE events among patients with FXI deficiency to their matched general population reference group

|                                               | N events | 10-year risk (95% CI) | Unadjusted HR (95% CI) | Full adjusted HR (95% CI) | Full adjusted HR (95% CI), INCIDENT CASES |
|-----------------------------------------------|----------|-----------------------|------------------------|---------------------------|-------------------------------------------|
| Severe FXI deficiency (<15%)                  |          |                       |                        |                           |                                           |
| Factor XI cohort, <i>n</i> = 213              | 1        | 0.50% (0.00–1.40%)    | 1.02 (0.13–8.29)       | 0.67 (0.08–5.76)          | –                                         |
| General population controls, <i>n</i> = 1,491 | 7        | 0.70% (0.10–1.20%)    | Ref.                   | Ref.                      | Ref.                                      |
| Partial FXI deficiency (15 to <50%)           |          |                       |                        |                           |                                           |
| Factor XI cohort, <i>n</i> = 373              | 2        | 0.60% (0.00–1.30%)    | 1.98 (0.41–9.52)       | 1.56 (0.32–7.56)          | 0.67 (0.08–5.47)                          |
| General population controls, <i>n</i> = 2,611 | 7        | 0.30% (0.10–0.60%)    | Ref.                   | Ref.                      | Ref.                                      |
| Overall FXI deficiency (<50%)                 |          |                       |                        |                           |                                           |
| Factor XI cohort, <i>n</i> = 586              | 3        | 0.50% (0.00–1.10%)    | 1.50 (0.43–5.21)       | 1.13 (0.32–3.96)          | 0.45 (0.06–3.47)                          |
| General population controls, <i>n</i> = 4,102 | 14       | 0.40% (0.20–0.70%)    | Ref.                   | Ref.                      | Ref.                                      |

Abbreviations: CI, confidence interval; FXI, factor XI; HR, hazard ratio; VTE, venous thromboembolism.
